# Supplementary material for: Oxysterol misbalance critically contributes to Wilson disease pathogenesis
Source: PubMed Central journal article supplement — Sci Adv. 2022 Oct 19;8(42):eadc9022. doi: 10.1126/sciadv.adc9022 (PMC9581482; doi:10.1126/sciadv.adc9022), 2022-10-19
Supplement: sciadv.adc9022_sm.pdf [file sciadv.adc9022_sm.pdf]

Supplementary Materials for  
**Oxysterol misbalance critically contributes to Wilson disease pathogenesis**

Som Dev *et al.*

Corresponding author: Svetlana Lutsenko, [lutsenko@jhmi.edu](mailto:lutsenko@jhmi.edu); James P. Hamilton, [jpahamilton@jhmi.edu](mailto:jpahamilton@jhmi.edu)

*Sci. Adv.* **8**, eadc9022 (2022)  
DOI: 10.1126/sciadv.adc9022

**This PDF file includes:**

Figs. S1 to S9  
Tables S1 to S7

SULT1E1 Immunohistochemistry

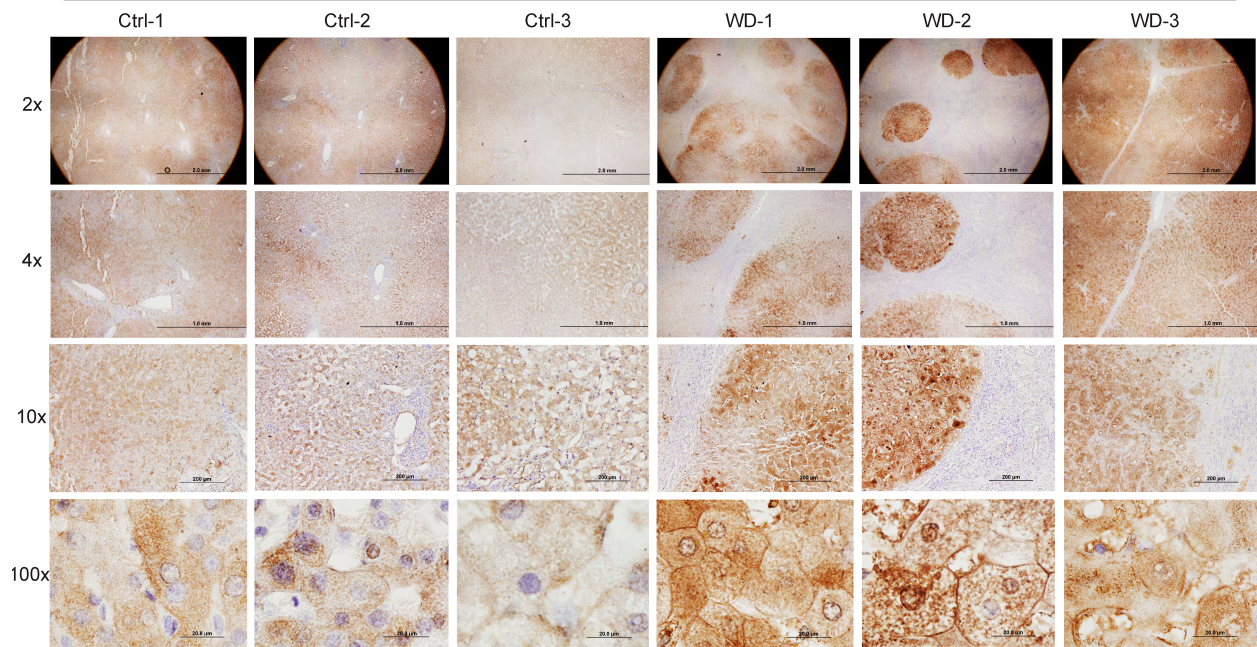

**Fig. S1. SULT1E1 expression is induced in WD.** Immunohistochemistry of SULT1E1 in the WD patient liver sections shows strong SULT1E1 signal in hepatocytes (right side panel) as compared to healthy controls (left side panel) as indicated by different magnifications. Scale bar-2 mm, 1 mm, 200 μm & 20 μm, n=3/group respectively.



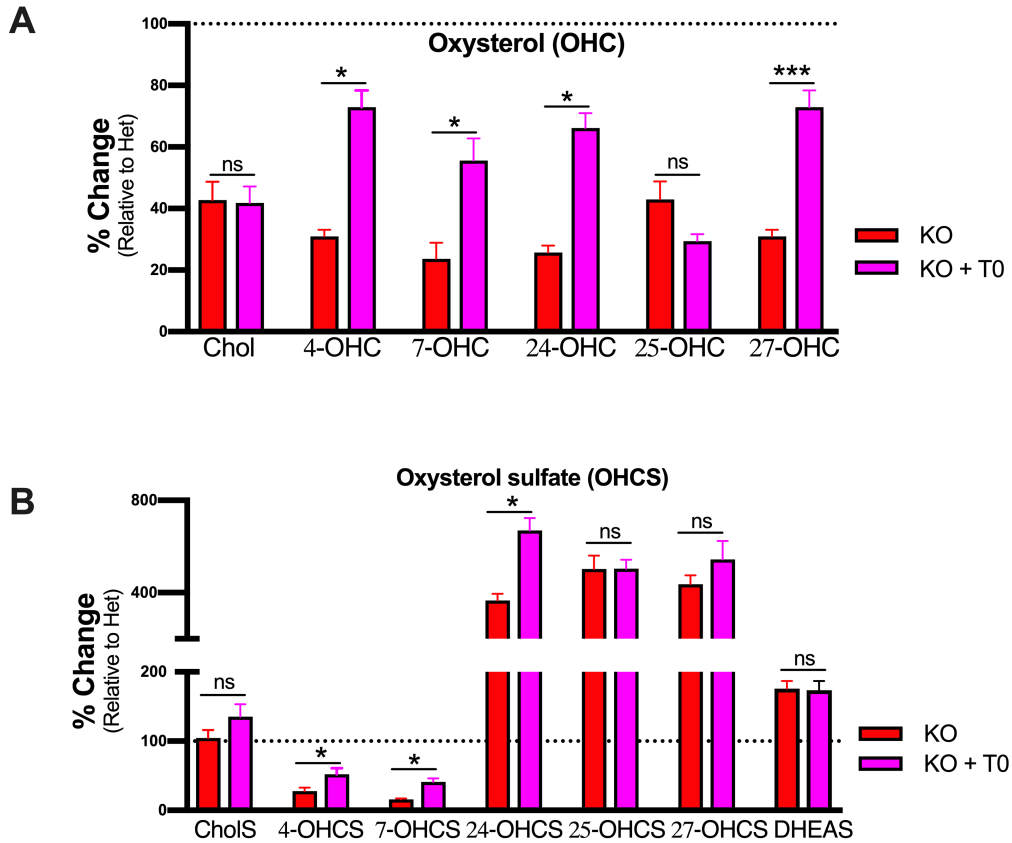

**Fig. S2. LXR agonist (T0901317) primarily regulates oxysterol synthesis.** (A) Liver oxysterols were significantly reduced in KO mice relative to Het (100%). Treatment with LXR agonist significantly elevated OHC (4-OHC, 7-OHC, 24-OHC, 27-OHC) in KO mice as compared to untreated KO. (B) Oxysterol sulfates (24-OHCS, 25-OHCS, 27-OHCS, DHEAS) were significantly elevated in the KO liver relative to Het (100%). Treatment with LXR agonist does not affect 25-OHCS, 27-OHCS, DHEAS, and CholS level in KO mice as compared to untreated KO. However, it increases 4-OHCS, 7-OHCS, 24-OHCS level in KO mice. Values represent mean  $\pm$  SD. \* $P < 0.05$ , \*\* $P < 0.01$ , \*\*\* $P < 0.001$ ,  $n = 6$  male mice/group. Red color denotes KO and magenta KO + T0, respectively. Abbreviations: Chol-Cholesterol; 4-OHC-4-Hydroxycholesterol; 7-OHC-7-Hydroxycholesterol; 24-OHC-24-Hydroxycholesterol, 25-OHC-25-Hydroxycholesterol; 4-OHCS-4-Hydroxycholesterol-3-sulfate; 7-OHCS-7-Hydroxycholesterol-3-sulfate, 24-OHCS-24-Hydroxycholesterol-3-sulfate; 25-OHCS-25-Hydroxycholesterol-3-sulfate; 27-OHCS-27-Hydroxycholesterol-3-sulfate; DHEAS-Dehydroepiandrosterone sulfate; T0, T0901317; ns, non-significant.

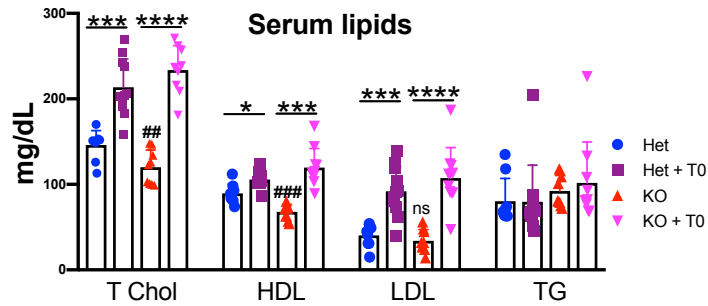

**Fig. S3. LXR agonist (T0901317) upregulates lipid metabolism.** Serum lipids (Total Chol, HDL, LDL) were reduced in untreated KO female mice and were elevated in the treated female mice (both Het and KO), whereas TG levels remain unchanged. Statistical comparisons were made using ANOVA with Tukey's post-hoc test. Values represent mean  $\pm$  SD. \* $p < 0.05$ , \*\* $p < 0.01$ , \*\*\* $p < 0.001$ , \*\*\*\* $p < 0.0001$  between untreated and treated mice of the same genotype; # $p < 0.05$ , ## $p < 0.01$ , ### $p < 0.001$  between untreated Het vs. KO mice,  $n=8-11$  mice per group. Blue color denotes Het, purple Het + T0, red KO, and magenta KO + T0, respectively. Abbreviations: T0, T0901317; ns, non-significant.

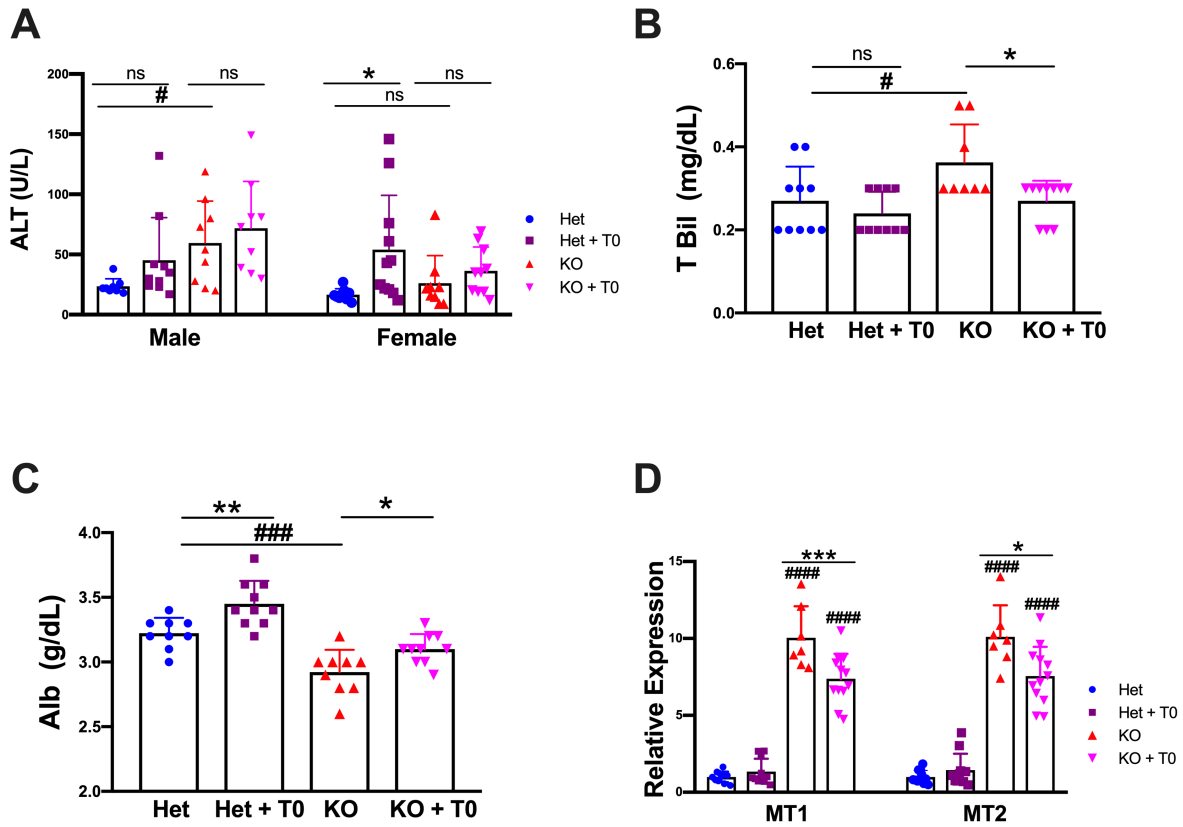

**Fig. S4. LXR agonist partially improves liver function.** (A) T0901317 treatment does not affect serum ALT levels in male and female KO mice. (B-C) LXR agonist reduces total serum bilirubin and increases albumin in drug-treated female KO mice. (D) Endogenous Cu chelators metallothioneins (MT1 and MT2) mRNA levels were remained significantly up-regulated in untreated KO and drug treated KO mice liver, and drug treatment reduces metallothionein level partly. Values represent mean  $\pm$  SD. \* $p < 0.05$ , \*\* $p < 0.01$ , \*\*\* $p < 0.001$  between untreated and treated mice of the same genotype; # $p < 0.05$ , ## $p < 0.01$ , ### $p < 0.001$ , #### $p < 0.0001$  between untreated Het vs. KO mice,  $n=8-11$  mice per group. The blue color symbol denotes Het, purple Het + T0, red KO, and magenta KO + T0, respectively. Abbreviations: T0, T0901317; ns, non-significant.

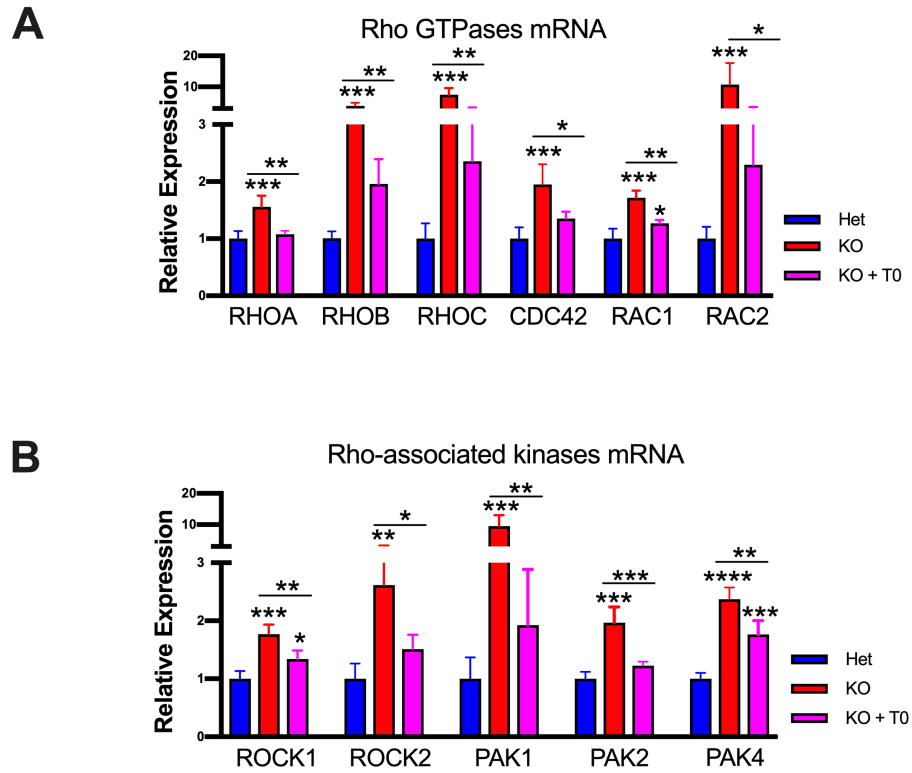

**Fig. S5. LXR agonist reduces Rho GTPase signaling in *Atp7b*<sup>-/-</sup> mice liver.** (A-B) Rho GTPases (RhoA-C, CDC42, RAC1, and RAC2) and Rho-associated kinases (ROCK1, ROCK2, PAK1, PAK2, PAK4) mRNA expression were significantly induced in KO mice liver as compared to Het. LXR agonist significantly reduced Rho GTPases and Rho-associated kinases mRNA level in KO mice compared to untreated KO. Values represent mean  $\pm$  SD. \* $P < 0.05$ , \*\* $P < 0.01$ , \*\*\* $P < 0.001$ , \*\*\*\* $P < 0.0001$ ,  $n = 4$  male mice/group. Blue color denotes Het, red KO and magenta KO + T0, respectively. Abbreviations: T0, T0901317; ns, non-significant.

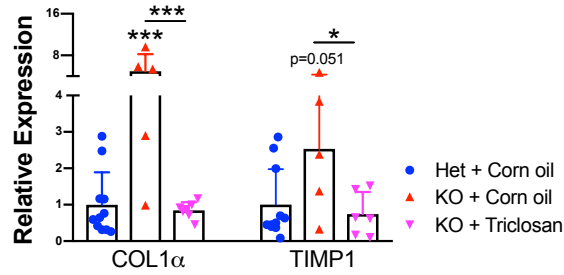

**Fig. S6. Sult1e1 inhibition reduces fibrotic genes expression in *Atp7b*<sup>-/-</sup> mice.** Fibrosis markers (Col1 $\alpha$  and Timp1) expression is significantly induced in KO male mice liver at 12-wk, and triclosan treatment reduces their level significantly. Values represent mean  $\pm$  SD. \* $p < 0.05$ , \*\* $p < 0.01$ , \*\*\* $p < 0.001$ ,  $n=5-10$  mice per group. Blue color symbol denotes Het + corn oil, red KO + corn oil and magenta KO + triclosan, respectively.

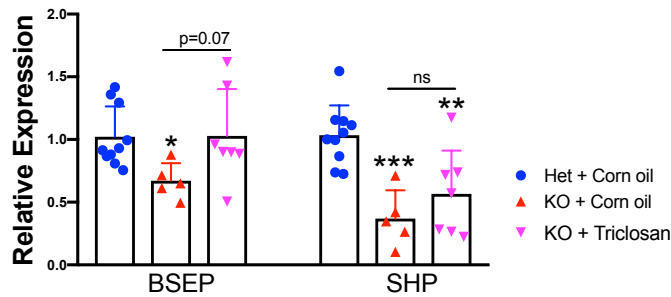

**Fig. S7. Sult1e1 inhibition does not restore FXR target genes expression.** FXR targets (BSEP and SHP) expression is significantly reduced in KO male mice liver at 12-wk, and triclosan treatment does not improve their level significantly. Values represent mean  $\pm$  SD. \* $p < 0.05$ , \*\* $p < 0.01$ , \*\*\* $p < 0.001$ ,  $n=5-10$  mice per group. Blue color symbol denotes Het + corn oil, red KO + corn oil and magenta KO + triclosan, respectively. Abbreviations: ns, non-significant.



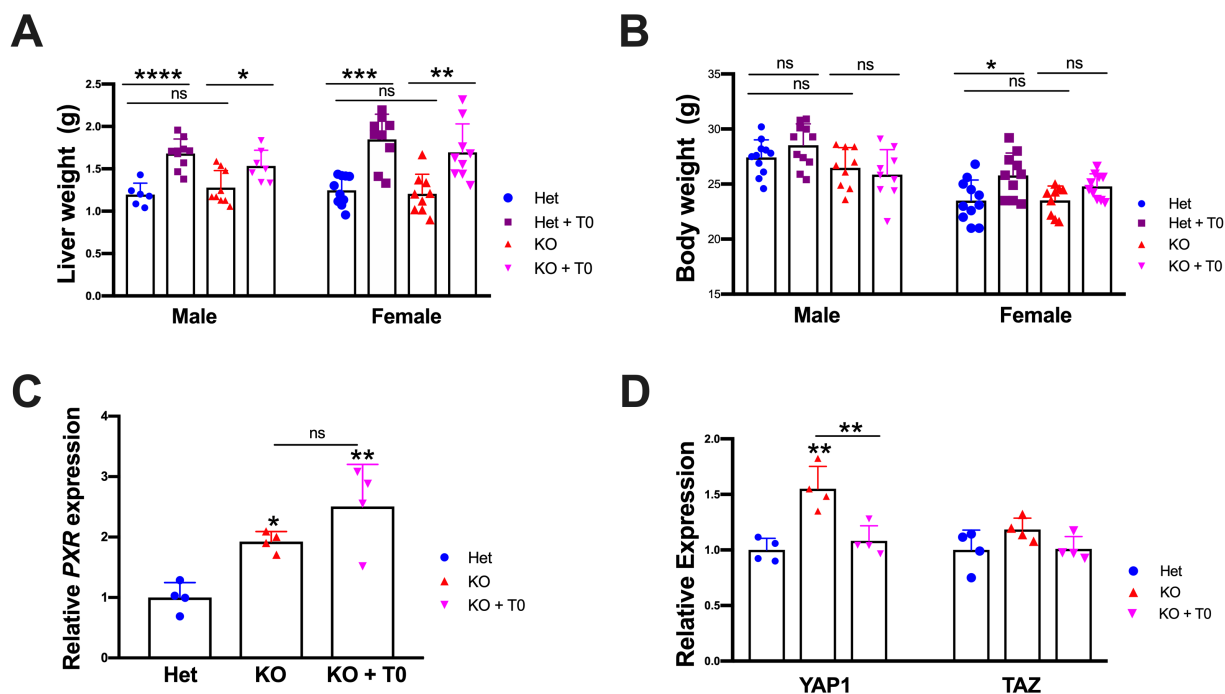

**Fig. S8. LXR agonist induces liver enlargement in *Atp7b*<sup>-/-</sup> mice without large impact on body weight and PXR/YAP1 signaling.** (A) LXR agonist-induced liver enlargement in male (left panel) and female (right panel) mice irrespective of genotype. (B) No significant change in body weight analysis was observed in males while a small increase in body weight observed in female Het mice in response to drug treatment. Statistical comparisons were made using ANOVA with Tukey's post-hoc test. Values represent mean  $\pm$  SD. \* $p < 0.05$ , \*\* $p < 0.01$ , \*\*\* $p < 0.001$ , \*\*\*\* $p < 0.0001$  between untreated and treated mice of the same genotype,  $n=8-11$  mice per group, (C-D) Significant increase in the PXR, YAP1, and TAZ transcripts level in the KO male mice, and LXR agonist did not increase their level further in *Atp7b*<sup>-/-</sup> mice (KOD vs. KO). The blue color symbol denotes Het, purple Het + T0, red KO, and magenta KO + T0, respectively. Values represent mean  $\pm$  SD. \* $p < 0.05$ , \*\* $p < 0.01$ ,  $n=4$  mice per group, Abbreviations: T0, T0901317; ns, non-significant.

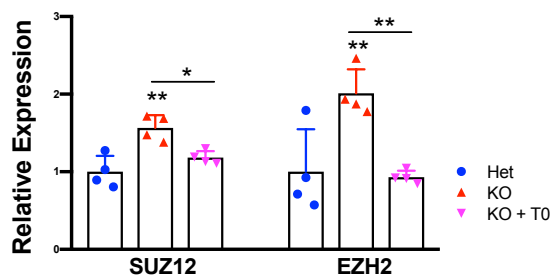

**Fig. S9. Transcriptomic analysis in *Atp7b*<sup>-/-</sup> mice.** Significant increase in the SUZ12 and EZH2 expression level in the KO male mice liver, and LXR agonist treatment reduces their level significantly in KO mice. Values represent mean  $\pm$  SD. \* $p < 0.05$ , \*\* $p < 0.01$ ,  $n=4$  mice per group. Blue color denotes Het, red KO, and magenta KO + T0, respectively. Abbreviations: T0, T0901317.

**Table S1. Expression of NRF2 target genes in *Atp7b*<sup>-/-</sup> mice liver**

| <b>NRF2 regulated system</b>    | <b>Gene symbol</b> | <b>Gene name</b>                                         | <b>Het (TPM) (n=4)</b> | <b>KO (TPM) (n=4)</b> | <b>KO vs Het p Val</b> |
|---------------------------------|--------------------|----------------------------------------------------------|------------------------|-----------------------|------------------------|
| <b>GSH-based system</b>         | Gpx4               | Glutathione peroxidase 4                                 | 301.3                  | 533.8                 | 0.045                  |
|                                 | Gsr1               | Glutathione reductase                                    | 45.36                  | 101.9                 | 0.003                  |
|                                 | Gss                | Glutathione synthetase                                   | 44.45                  | 116.1                 | 0.0008                 |
|                                 | Slc7a11            | Cystine/glutamate transporter                            | 0.13                   | 0.60                  | 0.04                   |
|                                 | Gpx2               | Glutathione peroxidase 2                                 | 0                      | 19.0                  | 0.22                   |
| <b>TXN-based system</b>         | Txn1               | Thioredoxin                                              | 252.1                  | 481.3                 | 0.002                  |
|                                 | Txnrd1             | Thioredoxin reductase 1                                  | 52.0                   | 117.8                 | 0.006                  |
|                                 | Txnip              | Thioredoxin interacting protein                          | 41.61                  | 141.6                 | 0.01                   |
|                                 | Srxn1              | Sulfiredoxin 1                                           | 16.03                  | 89.27                 | 0.001                  |
|                                 | Prdx1              | Peroxiredoxin 1                                          | 2.95                   | 5.48                  | 0.003                  |
| <b>ROS &amp; detoxification</b> | Gstm1              | Glutathione S-transferase mu 1                           | 1264                   | 2496                  | 0.007                  |
|                                 | Ephx1              | Epoxide hydrolase 1                                      | 311.2                  | 1219.4                | 0.0007                 |
|                                 | Sult1a1            | Sulfotransferase 1A1                                     | 204.6                  | 430.3                 | 0.001                  |
|                                 | Abcc2              | ATP-binding cassette, sub-family C 2                     | 100.6                  | 196                   | 0.001                  |
|                                 | Gsta4              | Glutathione S-transferase alpha 4                        | 90.87                  | 180.6                 | 0.034                  |
|                                 | Gstm3              | Glutathione S-transferase mu 3                           | 63.12                  | 850.1                 | 0.02                   |
|                                 | Gstm2              | Glutathione S-transferase mu 2                           | 59.8                   | 299.6                 | 0.023                  |
|                                 | Gsta1              | Glutathione S-transferase alpha 1                        | 5.27                   | 223.9                 | 0.003                  |
|                                 | Gsta2              | Glutathione S-transferase alpha 2                        | 36.82                  | 129.0                 | 7E-05                  |
|                                 | Sod3               | Superoxide dismutase 3, extracellular                    | 13.19                  | 38.94                 | 0.005                  |
|                                 | Akr1b8             | Alpha keto reductase family 1, B8                        | 5.88                   | 20.88                 | 0.05                   |
|                                 | Nqo1               | NAD(P)H quinone dehydrogenase 1                          | 4.33                   | 44.57                 | 0.03                   |
|                                 | Akr1b3             | Alpha keto reductase family 1, B3                        | 1.85                   | 4.87                  | 0.01                   |
|                                 | Adh7               | Alcohol dehydrogenase class                              | 1.17                   | 4.05                  | 0.0001                 |
|                                 | Abcc1              | ATP-binding cassette, sub-family C 1                     | 0.75                   | 3.05                  | 0.02                   |
|                                 | Sult1e1            | Sulfotransferase 1E1                                     | 0.26                   | 148.9                 | 0.0006                 |
|                                 | Mgst2              | Microsomal glutathione S-transferase                     | 0                      | 82.88                 | 0.003                  |
| <b>NADPH regeneration</b>       | Idh1               | Isocitrate dehydrogenase 1, NADP(+)                      | 321.5                  | 512.9                 | 0.005                  |
|                                 | Me1                | Malic enzyme 1, NADP(+) cytosolic                        | 58.24                  | 83.85                 | 0.08                   |
|                                 | Pgd                | Phosphogluconate dehydrogenase                           | 8.91                   | 44.4                  | 0.006                  |
|                                 | G6pd               | Glucose-6-phosphate dehydrogenase                        | 2.97                   | 11.96                 | 0.03                   |
| <b>Heme &amp; Fe system</b>     | Ft-L               | Ferritin-L                                               | 5582.2                 | 8438.8                | 0.005                  |
|                                 | Ft-H               | Ferritin-H                                               | 869.2                  | 1655.6                | 0.009                  |
|                                 | BlvrB              | Biliverdin reductase B                                   | 122.3                  | 366.9                 | 0.008                  |
|                                 | Hmox1              | Heme oxygenase 1                                         | 32.96                  | 123.2                 | 0.02                   |
| <b>Transcription (TF)</b>       | Nrf2               | Nuclear factor, erythroid derived 2, like 2              | 22.47                  | 74.67                 | 0.02                   |
|                                 | Maf                | avian musculoaponeurotic fibrosarcoma oncogene homolog   | 11.59                  | 21.34                 | 0.02                   |
|                                 | MafG               | v-maf musculoaponeurotic fibrosarcoma oncogene homolog G | 10.20                  | 23.01                 | 0.0004                 |
|                                 | MafK               | v-maf musculoaponeurotic fibrosarcoma oncogene homolog K | 4.91                   | 17.73                 | 0.0001                 |

TPM- Transcript per million

**Table S2. Top upstream regulators in *Atp7b*<sup>-/-</sup> mice liver (IPA)**

| S. NO. | Name         | Molecule type                     | z-score | p-value                | Targets |
|--------|--------------|-----------------------------------|---------|------------------------|---------|
| 1      | IFNG         | Cytokine                          | 9.28    | 6.75x10 <sup>-45</sup> | 867     |
| 2      | TGFβ1        | Growth factor                     | 2.86    | 1.55x10 <sup>-35</sup> | 1227    |
| 3      | NR1H3 (LXRα) | Ligand-dependent nuclear receptor | -0.8    | 1.06x10 <sup>-33</sup> | 921     |
| 4      | TP53         | Transcription regulator           | 0.95    | 1.02x10 <sup>-30</sup> | 969     |

IFNG- Interferon  $\gamma$ ; TGFβ1-Transforming growth factor  $\beta$ 1; NR1H3-Nuclear Receptor Subfamily 1 Group H Member 3; TP53-Tumor protein P53; IPA-Ingenuity pathway analysis

**Table S3. Sterol analysis in the *Atp7b*<sup>-/-</sup> mice with age (LC-MS/MS)**

| Sterols<br>(pg/mg of<br>tissue) | 12-wk<br>Het vs KO ( <i>p</i> value) | Change<br>(%) | 20-wk<br>Het vs KO ( <i>p</i> value) | Change<br>(%) |
|---------------------------------|--------------------------------------|---------------|--------------------------------------|---------------|
| <b>Oxysterol</b>                |                                      |               |                                      |               |
| Chol                            | 4141 vs 3264 ( <i>p</i> =0.11)       | 21.1 %        | 3568 vs 1527 ( <i>p</i> =0.001)      | 57.2 % ↓      |
| 4-OHC                           | 523 vs 249 ( <i>p</i> =0.0003)       | 52.3 % ↓      | 415 vs 128.6 ( <i>p</i> =0.0002)     | 69 % ↓        |
| 7-OHC                           | 838 vs 319 ( <i>p</i> <0.0001)       | 61.9 % ↓      | 666.7 vs 158 ( <i>p</i> <0.0001)     | 76.3 % ↓      |
| 24-OHC                          | 712 vs 201 ( <i>p</i> <0.0001)       | 71.7 % ↓      | 887.1 vs 227.7 ( <i>p</i> <0.0001)   | 74.4 % ↓      |
| 25-OHC                          | 1115 vs 494.2 ( <i>p</i> <0.0001)    | 55.6 % ↓      | 566 vs 243.3 ( <i>p</i> <0.0001)     | 57 % ↓        |
| 27-OHC                          | 1874 vs 859.2 ( <i>p</i> <0.0001)    | 54.1 % ↓      | 678.3 vs 914.3 ( <i>p</i> =0.32)     | 34.8 %        |
| <b>Oxysterol sulfate</b>        |                                      |               |                                      |               |
| CholS                           | 752.2 vs 1283 ( <i>p</i> =0.01)      | 70 % ↑        | 602 vs 630 ( <i>p</i> =0.99)         | 4.6 %         |
| 4-OHCS                          | 335.9 vs 261.2 (0.06)                | 22.2 % ↓      | 341.7 vs 96.0 ( <i>p</i> <0.0001)    | 71.8 % ↓      |
| 7-OHCS                          | 273 vs 99 ( <i>p</i> <0.0001)        | 63.7 % ↓      | 177.8 vs 28.0 ( <i>p</i> <0.0001)    | 84 % ↓        |
| 24-OHCS                         | 293 vs 836.2 ( <i>p</i> <0.0001)     | 185 % ↑       | 153.2 vs 561.1 ( <i>p</i> <0.0001)   | 266 % ↑       |
| 25-OHCS                         | 254.5 vs 1059 ( <i>p</i> <0.0001)    | 316 % ↑       | 143.6 vs 721.5 ( <i>p</i> <0.0001)   | 402 % ↑       |
| 27-OHCS                         | 649.8 vs 1608 ( <i>p</i> <0.0001)    | 147 % ↑       | 522.7 vs 2280 ( <i>p</i> =0.0002)    | 336 % ↑       |
| DHEAS                           | 503.3 vs 1188 ( <i>p</i> <0.0001)    | 136 % ↑       | 396.2 vs 694.4 ( <i>p</i> =0.0002)   | 75 % ↑        |

n=6 male mice/group

Chol-Cholesterol; 4-OHC-4-Hydroxycholesterol; 7-OHC-7-Hydroxycholesterol; 24-OHC-24-Hydroxycholesterol; 27-OHC-27-Hydroxycholesterol; 4-OHCS-4-Hydroxycholesterol-3-sulfate; 7-OHCS-7-Hydroxycholesterol-3-sulfate; 24-OHCS-24-Hydroxycholesterol-3-sulfate; 27-OHCS-27-Hydroxycholesterol-3-sulfate; DHEA-Dehydroepiandrosterone sulfate

**Table S4. List of antibodies used in the study**

| <b>Antibodies</b>           | <b>Company</b> | <b>Cat No</b> | <b>Dilution</b>          |
|-----------------------------|----------------|---------------|--------------------------|
| p38 $\alpha/\beta$          | Santa Cruz     | sc-7972       | 1:1000 (WB)              |
| ERK1/2                      | Cell Signaling | 4695          | 1:2000 (WB)              |
| JNK                         | Cell Signaling | 9252          | 1:1000 (WB)              |
| SMAD2                       | Cell Signaling | 5339          | 1:1000 (WB)              |
| Anti-Rabbit HRP             | Cell Signaling | 7074          | 1:5,000 (WB)             |
| Anti-Mouse HRP              | Cell Signaling | 7076          | 1:5,000 (WB)             |
| GAPDH-HRP                   | Sigma          | G9295         | 1:10,000 (WB)            |
| NRF2                        | Cell Signaling | 12721         | 1:1,000 (WB), 1:100 (IF) |
| Lamin A                     | Abcam          | Ab26300       | 1:1000 (WB)              |
| F4/80                       | Abcam          | ab90247       | 1:100 (IF)               |
| Desmin                      | Abcam          | ab32362       | 1:50 (IF)                |
| TGF $\beta$ RII             | Abcam          | sc-17792      | 1:100 (IF)               |
| DARat Alexa fluor 488       | Invitrogen     | A21208        | 1:500 (IF)               |
| DARb Alexa fluor 647        | Invitrogen     | A31573        | 1:500 (IF)               |
| DARb Alexa fluor 488        | Invitrogen     | A21206        | 1:500 (IF)               |
| DAM Alexa fluor 647         | Invitrogen     | A31571        | 1:500 (IF)               |
| GARat Alexa fluor 488       | Invitrogen     | A11077        | 1:500 (IF)               |
| SULT1E1                     | Santa Cruz     | sc-376009     | 1:250(m); 1:100(h) (IHC) |
| TGF $\beta$ 1               | Santa Cruz     | sc-130348     | 1:250 (IHC)              |
| Biotinylated Anti mouse IgG | Vector Lab     | BA-9200       | 1:1000 (IHC)             |

DARat- Donkey Anti Rat; DARb-Donkey Anti Rabbit; DAM-Donkey Anti Mouse; GARat-Goat Anti Rat  
 WB-Western Blotting; IF-Immunofluorescence; IHC-Immunohistochemistry

**Table S5. List of primers (*Mus musculus*) used for qRT-PCR**

| S. No | Primer       | Sequence                                                       |
|-------|--------------|----------------------------------------------------------------|
| 1     | ATP7B        | 5'-TTCTTGCCTCAAGTCCATTG-3'<br>5'-CCTCAAAGCCATATCCTCA-3'        |
| 2     | MT1          | 5'-CACTTGCACCAGCTCCTG-3'<br>5'-GAAGACGCTGGGTTGGTC-3'           |
| 3     | MT2          | 5'-GCAAACAATGCAAATGTACTTCC-3'<br>5'-CTATTTACACAGATGTGGGGACC-3' |
| 4     | SULT1E1      | 5'-CTCGCTGACATCATCCTCGC-3'<br>5'-GCGTTTTTGTGCCGTAGCA-3'        |
| 5     | COX2         | 5'-TGAGCAACTATTCCAAACCAG-3'<br>5'-GCACGTAGTCTTCGATCACTATC-3'   |
| 6     | TNF $\alpha$ | 5'-CTGTGAAGGGAATGGGTGTT-3'<br>5'-GGTCACTGTCCCAGCATCTT-3'       |
| 7     | iNOS         | 5'-CCTTGTTTCTAGCTACGCCTTC-3'<br>5'-AAGGCCAAACACAGCATACC-3'     |
| 8     | IL-6         | 5'-TAGTCCTTCTACCCCAATTTCC-3'<br>5'-TTGGTCTTAGCCACTCCTTC-3'     |
| 9     | COL1A1       | 5'-GAGCGGAGAGTACTGGATCG-3'<br>5'-TACTCGAACGGAATCCATC-3'        |
| 10    | TIMP1        | 5'-CGAGACCACCTTATACCAGCG-3'<br>5'-ATGACTGGGGTGTAGGCGTA-3'      |
| 11    | IL-1 $\beta$ | 5'-GAAATGCCACCTTTTGACAGTG-3'<br>5'-TGGATGCTCTCATCAGGACAG-3'    |
| 12    | CD24A        | 5'-GAAAGGGGGCTTGGTTCTAC-3'<br>5'-TCCTTCTTCCCAGGAAGGTT-3'       |
| 13    | FASN         | 5'-CTGCCTTCGGTTCAGTCTC-3'<br>5'-AGTCTCACTGGAAGAGCTGTG-3'       |
| 14    | SCD1         | 5'-TTCTTGCATACACTCTGGTGC-3'<br>5'-CGGGATTGAATGTTCTTGTGCT-3'    |
| 15    | SHP          | 5'-TATGCGTACCTGAAGGGCAC-3'<br>5'-CCAGGGCTCCAAGACTTCAC-3'       |
| 16    | BSEP         | 5'-AGGTTGTGGTAATCACTGGG-3'<br>5'-TCAAACCATCCGATTTCCATTCT-3'    |
| 17    | ABCA1        | 5'-AAAACCGCAGACATCCTTCAG-3'<br>5'-CATACCGAAACTCGTTCACCC-3'     |
| 18    | ABCG5        | 5'-ACCCTTGTGTCTGACCCTTG-3'<br>5'-CACAATGTCCAAGCACCACAT-3'      |
| 19    | ABCG8        | 5'-CAGGTGCCTTGGTTTGAGC-3'<br>5'-CTTAGATTTCCGATGCCCAGC-3'       |
| 20    | CYP7A        | 5'-GCTGTGGTAGTGAGCTGTTG-3'<br>5'-GTTGTCCAAAGGAGGTTTACC-3'      |
| 21    | RPL19        | 5'-CCCGTCAGCAGATCAGGAA-3'<br>5'-GTCACAGGCTTGC GGATGA-3'        |

ATP7B-ATPase Cu<sup>++</sup> transporting beta polypeptide; MT-Metallothionein; SULT1E1-Sulfotransferase1E1; COX2-Cyclooxygenase-2; IL-6-Interleukin-6; TNF $\alpha$ -Tumor Necrosis Factor-alpha; FASN-Fatty Acid Synthase; SCD1-Stearoyl CoA desaturase 1; IL-1 $\beta$ -Interleukin-1beta; iNOS-Inducible Nitric Oxide Synthase; COL1 $\alpha$ -Collagen 1alpha; TIMP1-Tissue Inhibitor of Metalloproteinase1; CD24A-Cluster of differentiation 24; SHP- Small heterodimer partner; BSEP-Bile salt export pump; ABCG5-ATP Binding Cassette Subfamily G Member 5; ABCG8-ATP Binding Cassette Subfamily G Member 8; ABCA1-ATP-binding cassette transporter; RPL19-Ribosomal Protein L19



**Table S6. Mass spectral parameters used to identify (Pseudo-MRM) and quantify (MRM) each sterol derivative from liver tissue samples**

| S. NO. | Analyte                         | Pseudo MRM    | MRM           | CE    | Retention time |
|--------|---------------------------------|---------------|---------------|-------|----------------|
| 1      | Cholesterol                     | 369.40<369.40 | 369.40<161.50 | 10,40 | 8.02           |
| 2      | 4-Hydroxycholesterol            | 385.40<385.40 | 385.40<109.41 | 12,40 | 7.73           |
| 3      | 7-Hydroxycholesterol            | 385.41<385.41 | 367.35<159.12 | 10,40 | 7.30           |
| 4      | 24-Hydroxycholesterol           | 385.42<367.42 | 367.40<95.03  | 10,40 | 6.95           |
| 5      | 25-Hydroxycholesterol           | 385.43<367.43 | 367.40<147.09 | 10,40 | 7.09           |
| 6      | 27-Hydroxycholesterol           | 385.45<367.45 | 385.40<81.06  | 10,40 | 6.55           |
| 7      | Dihydroxycholesterol            | 401.40<401.40 | 401.40<109.41 | 10,40 | 7.62           |
| 8      | 25-Hydroxycholesterol-D6        | 391.40<391.40 | 391.40<147.42 | 10,35 | 6.93           |
| 9      | Cholesterol-3-sulfate           | 465.40<465.40 | 465.40<97.00  | 10,35 | 7.47           |
| 10     | 4-Hydroxycholesterol-3-sulfate  | 481.11<481.11 | 481.11<97.00  | 10,35 | 7.14           |
| 11     | 7-Hydroxycholesterol-3-sulfate  | 481.12<481.12 | 481.12<97.00  | 10,35 | 7.23           |
| 12     | 24-Hydroxycholesterol-3-sulfate | 481.13<481.13 | 481.13<97.00  | 10,35 | 7.10           |
| 13     | 25-Hydroxycholesterol-3-sulfate | 481.14<481.14 | 481.14<97.00  | 10,35 | 6.59           |
| 14     | 27-Hydroxycholesterol-3-sulfate | 481.15<481.15 | 481.15<97.00  | 10,35 | 6.89           |
| 15     | Pregnenolone sulfate            | 395.40<395.40 | 395.40<96.90  | 10,35 | 6.67           |
| 16     | Dehydroepiandrosterone sulfate  | 367.50<367.50 | 367.50<96.90  | 10,35 | 6.98           |
| 17     | Cholic acid                     | 407.30<407.30 | 407.30<407.30 | 10,35 | 5.88           |
| 18     | Chenodeoxycholic acid           | 391.30<391.30 | 391.30<391.30 | 10,35 | 7.10           |
| 19     | Chenodeoxycholic acid -D5       | 396.40<396.40 | 396.40<396.40 | 10,35 | 6.66           |
| 20     | Cholesterol sulfate-D7          | 494.40<494.40 | 494.40<97.00  | 10,35 | 7.32           |

Pseudo MRM- Precursor ion *m/z* to precursor ion *m/z* transition

MRM-Precursor ion *m/z* to product ion *m/z* transition

CE- Collision Energy

**Table S7. Mobile phase gradient program at constant flow at 250 ul/min**

| S. NO. | Time  | ddH2O (0.1% FA) | MeOH (0.1% FA) |
|--------|-------|-----------------|----------------|
| 1      | 0.05  | 60              | 40             |
| 2      | 2.50  | 5               | 95             |
| 3      | 7.50  | 5               | 95             |
| 4      | 12.50 | 40              | 60             |
| 5      | 14.00 | 40              | 60             |

FA- Formic acid
